# Supplementary material for: A Chromosomal Memory Triggered by Xist Regulates Histone Methylation in X Inactivation
Source: PLoS Biol. 2004 Jul 13;2(7):e171. doi: 10.1371/journal.pbio.0020171 (PMC449785; doi:10.1371/journal.pbio.0020171)
Supplement: Protocol S1 — (22 KB DOC). [file pbio.0020171.sd001.doc]

**Supplementary Methods**

# Generation and purification of GST fusion protein

Pr-Set7 was PCR amplified from IMAGE Clone IMAGp998P2111880 (RZPD Deutsches Ressourcenzentrum für Genomforschung), expressed as N-terminal GST fusion protein from Gateway vector pDEST 15 (Invitrogen) and purified as described before (Rea et al., 2000; Nature 406:593-599).

# *In vitro* histone methyltransferase assay

In vitro HMTase reactions were performed in 55l of methylase activity buffer (50mM glycine pH 9,3, 250mM sucrose and 2mM DTT) containing 20 g of synthetic linear peptides or of free histones (mixture of H1, H3, H2B, H2A and H4; Boehringer Mannheim) as substrate and 50 nCi S-adenosyl-[methyl-14C]-L-methionine (Amersham) as methyl donor. Approximately 50 µg of matrix bound GST-fusion protein was used during an overnight incubation at 37°C. Reactions were stopped by boiling in SDS loading buffer, peptides were resolved by SDS-PAGE and visualized by Coomassie staining and subsequent fluorography. Peptides used: histone H4 (12-31, unmodified) KGGAKRHRKVLRDNIQGITK-cys, histone H4 (12-31, mono-methylated at K20) KGGAKRHRK(Me)VLRDNIQGITK-cys, histone H4 (12-31, di-methylated at K20) KGGAKRHRK(Me2)VLRDNIQGITK-cys, histone H4 (12-31, tri-methylated at K20) KGGAKRHRK(Me3)VLRDNIQGITK-cys.

**Immuno-dotblots**

Increasing amounts (0.4, 2, 10 and 50 pmoles dissolved in 2l PBS) of different peptides as indicated in supplementary figures were spotted onto PVDF membranes (Hybond-P, Amersham Bioscience) and dried o/n at RT. Membranes were subsequently blocked in blocking solution (PBS, 3% (w/v) BSA) for 1 hour, incubated with primary antibodies for 1 hour and washed 5 times for 10 min in TBST (50 mM Tris-HCl

pH 8.0, 100 mM NaCl, 0.1% (v/v) Tween 20). Blots were exposed to secondary antibodies (HRP; Jackson Laboratories) for 45 min in PBS containing 5% (w/v) non-fat dry milk powder. After 5 washes for 10 min in TBST the blots were developed using a two component ECL detection reagent (Amersham Bioscience) and exposed to scientific imaging film (Kodak X-Omat Blue XB-1).
